# Supplementary material for: Barriers to and enablers of quality improvement in primary health care in low- and middle-income countries: a systematic review
Source: bioRxiv or medRxiv preprint supplement (doi:10.1101/2023.07.29.23293377), 2023-07-30
Supplement: Supplementary file [file media-1.pdf]

# Identification of new studies via databases and registers

Identification

Records identified from:  
Databases (n = 7,077)  
Registers (n = 0)

Records removed before screening:  
Duplicate records (n = 4,110)  
Records marked as ineligible by automation tools (n = 0)  
Records removed for other reasons (n = 0)

Screening

Records screened  
(n = 2,967)

Records excluded  
(n = 2,740)

Reports sought for retrieval  
(n = 227)

Reports not retrieved  
(n = 8)

Reports assessed for eligibility  
(n = 219)

Reports excluded:  
Wrong sample (n = 39)  
Wrong phenomenon of interest (n = 35)  
Wrong design (n = 47)  
Wrong evaluation (n = 54)  
Wrong research type (n = 15)

Included

New studies included in review  
(n = 47)  
Reports of new included studies  
(n = 50)
