# Supplementary material for: Barriers to and enablers of quality improvement in primary health care in low- and middle-income countries: a systematic review
Source: bioRxiv or medRxiv preprint supplement (doi:10.1101/2023.07.29.23293377), 2023-07-30
Supplement: Supplementary file [file media-3.pdf]

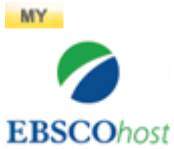

Wednesday, February 01, 2023 7:50:45 PM

| #   | Query                                                                                                                                                                                                                                                                                                                                                                                                                                                                                                                                                                                                                                                                                                                                                                                                                    | Limiters/Expanders                                                                      | Last Run Via                                                                                                     | Results |
|-----|--------------------------------------------------------------------------------------------------------------------------------------------------------------------------------------------------------------------------------------------------------------------------------------------------------------------------------------------------------------------------------------------------------------------------------------------------------------------------------------------------------------------------------------------------------------------------------------------------------------------------------------------------------------------------------------------------------------------------------------------------------------------------------------------------------------------------|-----------------------------------------------------------------------------------------|------------------------------------------------------------------------------------------------------------------|---------|
| S12 | AB (reproductive maternal newborn neonatal child adolescent) N5 health AND AB ( afghanistan OR albania OR algeria OR american samoa OR angola OR "antigua and barbuda" OR antigua OR barbuda OR argentina OR armenia OR armenian OR aruba OR azerbaijan OR bahrain OR bangladesh OR barbados OR republic of belarus OR belarus OR byelarus OR belorussia OR byelorussian OR belize OR british honduras OR benin OR dahomey OR bhutan OR bolivia OR "bosnia and herzegovina" OR bosnia OR herzegovina OR botswana OR bechuanaland OR brazil OR brasil OR bulgaria OR burkina faso OR burkina fasso OR upper volta OR burundi OR urundi OR cabo verde OR cape verde OR cambodia OR kampuchea OR khmer republic OR cameroon OR cameron OR cameroun OR central african republic OR ubangi shari OR chad OR chile OR china OR | Limiters - Date of Publication: 20000101-20221231<br>Search modes - SmartText Searching | Interface - EBSCOhost<br>Research Databases<br>Search Screen - Advanced Search<br>Database - MEDLINE<br>Complete | 71      |

colombia OR comoros  
OR comoro islands OR  
iles comores OR mayotte  
OR democratic republic  
of the congo OR  
democratic republic  
congo OR congo OR  
zaire OR costa rica OR  
"cote d'ivoire" OR "cote d'  
ivoire" OR cote divoire  
OR cote d ivoire OR ivory  
coast OR croatia OR  
cuba OR cyprus OR  
czech republic OR  
czechoslovakia OR  
djibouti OR french  
somaliland OR dominica  
OR dominican republic  
OR ecuador OR egypt  
OR united arab republic  
OR el salvador OR  
equatorial guinea OR  
spanish guinea OR  
eritrea OR estonia OR  
eswatini OR swaziland  
OR ethiopia OR fiji OR  
gabon OR gabonese  
republic OR gambia OR  
"georgia (republic)" OR  
georgian OR ghana OR  
gold coast OR gibraltar  
OR greece OR grenada  
OR guam OR guatemala  
OR guinea OR guinea  
bissau OR guyana OR  
british guiana OR haiti  
OR hispaniola OR  
honduras OR hungary  
OR india OR indonesia  
OR timor OR iran OR  
iraq OR isle of man OR  
jamaica OR jordan OR  
kazakhstan OR kazakh  
OR kenya OR  
"democratic people's  
republic of korea" OR  
republic of korea OR

north korea OR south  
korea OR korea OR  
kosovo OR kyrgyzstan  
OR kirghizia OR  
kirgizstan OR kyrgyz  
republic OR kirghiz OR  
laos OR lao pdr OR "lao  
people's democratic  
republic" OR latvia OR  
lebanon OR lebanese  
republic OR lesotho OR  
basutoland OR liberia  
OR libya OR libyan arab  
jamahiriya OR lithuania  
OR macau OR macao  
OR republic of north  
macedonia OR  
macedonia OR  
madagascar OR  
malagasy republic OR  
malawi OR nyasaland  
OR malaysia OR malay  
federation OR malaya  
federation OR maldives  
OR indian ocean islands  
OR indian ocean OR mali  
OR malta OR micronesia  
OR federated states of  
micronesia OR kiribati  
OR marshall islands OR  
nauru OR northern  
mariana islands OR  
palau OR tuvalu OR  
mauritania OR mauritius  
OR mexico OR moldova  
OR moldovian OR  
mongolia OR  
montenegro OR morocco  
OR ifni OR mozambique  
OR portuguese east  
africa OR myanmar OR  
burma OR namibia OR  
nepal OR netherlands  
antilles OR nicaragua OR  
niger OR nigeria OR  
oman OR muscat OR  
pakistan OR panama OR

papua new guinea OR  
new guinea OR paraguay  
OR peru OR philippines  
OR philipines OR  
phillipines OR  
phillippines OR poland  
OR "polish people's  
republic" OR portugal OR  
portuguese republic OR  
puerto rico OR romania  
OR russia OR russian  
federation OR ussr OR  
soviet union OR union of  
soviet socialist republics  
OR rwnda OR ruanda  
OR samoa OR pacific  
islands OR polynesia OR  
samoan islands OR  
navigator island OR  
navigator islands OR  
"sao tome and principe"  
OR saudi arabia OR  
senegal OR serbia OR  
seychelles OR sierra  
leone OR slovakia OR  
slovak republic OR  
slovenia OR melanesia  
OR solomon island OR  
solomon islands OR  
norfolk island OR norfolk  
islands OR somalia OR  
south africa OR south  
sudan OR sri lanka OR  
ceylon OR "saint kitts  
and nevis" OR "st. kitts  
and nevis" OR saint lucia  
OR "st. lucia" OR "saint  
vincent and the  
grenadines" OR saint  
vincent OR "st. vincent"  
OR grenadines OR  
sudan OR suriname OR  
surinam OR dutch guiana  
OR netherlands guiana  
OR syria OR syrian arab  
republic OR tajikistan OR  
tadjikistan OR

tadjikistan OR tadjik  
OR tanzania OR  
tanganyika OR thailand  
OR siam OR timor leste  
OR east timor OR togo  
OR togolese republic OR  
tonga OR "trinidad and  
tobago" OR trinidad OR  
tobago OR tunisia OR  
turkey OR turkmenistan  
OR turkmen OR uganda  
OR ukraine OR uruguay  
OR uzbekistan OR uzbek  
OR vanuatu OR new  
hebrides OR venezuela  
OR vietnam OR viet nam  
OR middle east OR west  
bank OR gaza OR  
palestine OR yemen OR  
yugoslavia OR zambia  
OR zimbabwe OR  
northern rhodesia OR  
global south OR africa  
south of the sahara OR  
sub-saharan africa OR  
subsaharan africa OR  
africa, central OR central  
africa OR africa, northern  
OR north africa OR  
northern africa OR  
magreb OR maghrib OR  
sahara OR africa,  
southern OR southern  
africa OR africa, eastern  
OR east africa OR  
eastern africa OR africa,  
western OR west africa  
OR western africa OR  
west indies OR indian  
ocean islands OR  
caribbean OR central  
america OR latin america  
OR "south and central  
america" OR south  
america OR asia, central  
OR central asia OR asia,  
northern OR north asia

OR northern asia OR  
 asia, southeastern OR  
 southeastern asia OR  
 south eastern asia OR  
 southeast asia OR south  
 east asia OR asia,  
 western OR western asia  
 OR europe, eastern OR  
 east europe OR eastern  
 europe ) AND (  
 (Research OR Study)  
 N20 "quality  
 improvement" )

|     |                                                                                                                                                                                                                                                                                                                                                                                                                                                                                                                                                                                                                                                                                                                                                                                                                                                                                                                                                                                                                                                                                                                                                        |                                                                                                                                             |                                                                                                                                                                              |    |
|-----|--------------------------------------------------------------------------------------------------------------------------------------------------------------------------------------------------------------------------------------------------------------------------------------------------------------------------------------------------------------------------------------------------------------------------------------------------------------------------------------------------------------------------------------------------------------------------------------------------------------------------------------------------------------------------------------------------------------------------------------------------------------------------------------------------------------------------------------------------------------------------------------------------------------------------------------------------------------------------------------------------------------------------------------------------------------------------------------------------------------------------------------------------------|---------------------------------------------------------------------------------------------------------------------------------------------|------------------------------------------------------------------------------------------------------------------------------------------------------------------------------|----|
| S11 | <p>AB ( "primary health<br/>         care" OR "primary care"<br/>         OR "public health care"<br/>         OR "integrated primary<br/>         care team" OR "PHC" )<br/>         AND AB ( afghanistan<br/>         OR albania OR algeria<br/>         OR american samoa OR<br/>         angola OR "antigua and<br/>         barbuda" OR antigua OR<br/>         barbuda OR argentina<br/>         OR armenia OR<br/>         armenian OR aruba OR<br/>         azerbaijan OR bahrain<br/>         OR bangladesh OR<br/>         barbados OR republic of<br/>         belarus OR belarus OR<br/>         byelarus OR belorussia<br/>         OR byelorussian OR<br/>         belize OR british<br/>         honduras OR benin OR<br/>         dahomey OR bhutan OR<br/>         bolivia OR "bosnia and<br/>         herzegovina" OR bosnia<br/>         OR herzegovina OR<br/>         botswana OR<br/>         bechuanaland OR brazil<br/>         OR brasil OR bulgaria<br/>         OR burkina faso OR<br/>         burkina fasso OR upper<br/>         volta OR burundi OR<br/>         urundi OR cabo verde<br/>         OR cape verde OR</p> | <p>Limiters - Date of<br/>         Publication: 20000101-<br/>         20221231<br/>         Search modes -<br/>         Boolean/Phrase</p> | <p>Interface - EBSCOhost<br/>         Research Databases<br/>         Search Screen - Advanced<br/>         Search<br/>         Database - MEDLINE<br/>         Complete</p> | 63 |
|-----|--------------------------------------------------------------------------------------------------------------------------------------------------------------------------------------------------------------------------------------------------------------------------------------------------------------------------------------------------------------------------------------------------------------------------------------------------------------------------------------------------------------------------------------------------------------------------------------------------------------------------------------------------------------------------------------------------------------------------------------------------------------------------------------------------------------------------------------------------------------------------------------------------------------------------------------------------------------------------------------------------------------------------------------------------------------------------------------------------------------------------------------------------------|---------------------------------------------------------------------------------------------------------------------------------------------|------------------------------------------------------------------------------------------------------------------------------------------------------------------------------|----|

cambodia OR  
kampuchea OR khmer  
republic OR cameroon  
OR cameron OR  
cameroun OR central  
african republic OR  
ubangi shari OR chad  
OR chile OR china OR  
colombia OR comoros  
OR comoro islands OR  
iles comores OR mayotte  
OR democratic republic  
of the congo OR  
democratic republic  
congo OR congo OR  
zaire OR costa rica OR  
"cote d'ivoire" OR "cote d'  
ivoire" OR cote divoire  
OR cote d ivoire OR ivory  
coast OR croatia OR  
cuba OR cyprus OR  
czech republic OR  
czechoslovakia OR  
djibouti OR french  
somaliland OR dominica  
OR dominican republic  
OR ecuador OR egypt  
OR united arab republic  
OR el salvador OR  
equatorial guinea OR  
spanish guinea OR  
eritrea OR estonia OR  
eswatini OR swaziland  
OR ethiopia OR fiji OR  
gabon OR gabonese  
republic OR gambia OR  
"georgia (republic)" OR  
georgian OR ghana OR  
gold coast OR gibraltar  
OR greece OR grenada  
OR guam OR guatemala  
OR guinea OR guinea  
bissau OR guyana OR  
british guiana OR haiti  
OR hispaniola OR  
honduras OR hungary  
OR india OR indonesia

OR timor OR iran OR  
iraq OR isle of man OR  
jamaica OR jordan OR  
kazakhstan OR kazakh  
OR kenya OR  
“democratic people's  
republic of korea” OR  
republic of korea OR  
north korea OR south  
korea OR korea OR  
kosovo OR kyrgyzstan  
OR kirghizia OR  
kirgizstan OR kyrgyz  
republic OR kirghiz OR  
laos OR lao pdr OR “lao  
people's democratic  
republic” OR latvia OR  
lebanon OR lebanese  
republic OR lesotho OR  
basutoland OR liberia  
OR libya OR libyan arab  
jamahiriya OR lithuania  
OR macau OR macao  
OR republic of north  
macedonia OR  
macedonia OR  
madagascar OR  
malagasy republic OR  
malawi OR nyasaland  
OR malaysia OR malay  
federation OR malaya  
federation OR maldives  
OR indian ocean islands  
OR indian ocean OR mali  
OR malta OR micronesia  
OR federated states of  
micronesia OR kiribati  
OR marshall islands OR  
nauru OR northern  
mariana islands OR  
palau OR tuvalu OR  
mauritania OR mauritius  
OR mexico OR moldova  
OR moldovian OR  
mongolia OR  
montenegro OR morocco  
OR ifni OR mozambique



OR portuguese east  
africa OR myanmar OR  
burma OR namibia OR  
nepal OR netherlands  
antilles OR nicaragua OR  
niger OR nigeria OR  
oman OR muscat OR  
pakistan OR panama OR  
papua new guinea OR  
new guinea OR paraguay  
OR peru OR philippines  
OR philipines OR  
phillipines OR  
phillippines OR poland  
OR "polish people's  
republic" OR portugal OR  
portuguese republic OR  
puerto rico OR romania  
OR russia OR russian  
federation OR ussr OR  
soviet union OR union of  
soviet socialist republics  
OR rwanada OR ruanda  
OR samoa OR pacific  
islands OR polynesia OR  
samoan islands OR  
navigator island OR  
navigator islands OR  
"sao tome and principe"  
OR saudi arabia OR  
senegal OR serbia OR  
seychelles OR sierra  
leone OR slovakia OR  
slovak republic OR  
slovenia OR melanesia  
OR solomon island OR  
solomon islands OR  
norfolk island OR norfolk  
islands OR somalia OR  
south africa OR south  
sudan OR sri lanka OR  
ceylon OR "saint kitts  
and nevis" OR "st. kitts  
and nevis" OR saint lucia  
OR "st. lucia" OR "saint  
vincent and the  
grenadines" OR saint

vincent OR "st. vincent"  
OR grenadines OR  
sudan OR suriname OR  
surinam OR dutch guiana  
OR netherlands guiana  
OR syria OR syrian arab  
republic OR tajikistan OR  
tadjikistan OR  
tadzhikistan OR tadjik  
OR tanzania OR  
tanganyika OR thailand  
OR siam OR timor leste  
OR east timor OR togo  
OR togolese republic OR  
tonga OR "trinidad and  
tobago" OR trinidad OR  
tobago OR tunisia OR  
turkey OR turkmenistan  
OR turkmen OR uganda  
OR ukraine OR uruguay  
OR uzbekistan OR uzbek  
OR vanuatu OR new  
hebrides OR venezuela  
OR vietnam OR viet nam  
OR middle east OR west  
bank OR gaza OR  
palestine OR yemen OR  
yugoslavia OR zambia  
OR zimbabwe OR  
northern rhodesia OR  
global south OR africa  
south of the sahara OR  
sub-saharan africa OR  
subsaharan africa OR  
africa, central OR central  
africa OR africa, northern  
OR north africa OR  
northern africa OR  
magreb OR maghrib OR  
sahara OR africa,  
southern OR southern  
africa OR africa, eastern  
OR east africa OR  
eastern africa OR africa,  
western OR west africa  
OR western africa OR  
west indies OR indian

ocean islands OR  
 caribbean OR central  
 america OR latin america  
 OR "south and central  
 america" OR south  
 america OR asia, central  
 OR central asia OR asia,  
 northern OR north asia  
 OR northern asia OR  
 asia, southeastern OR  
 southeastern asia OR  
 south eastern asia OR  
 southeast asia OR south  
 east asia OR asia,  
 western OR western asia  
 OR europe, eastern OR  
 east europe OR eastern  
 europe ) AND (  
 (Research OR Study)  
 N20 "quality  
 improvement" )

|     |                                                                                                                                                                                                                                                                                                                                                                                                                                                                                                                                                                                                                            |                                                                                              |                                                                                                                     |    |
|-----|----------------------------------------------------------------------------------------------------------------------------------------------------------------------------------------------------------------------------------------------------------------------------------------------------------------------------------------------------------------------------------------------------------------------------------------------------------------------------------------------------------------------------------------------------------------------------------------------------------------------------|----------------------------------------------------------------------------------------------|---------------------------------------------------------------------------------------------------------------------|----|
| S10 | AB ( "primary health<br>care" OR "primary care"<br>OR "public health care"<br>OR "integrated primary<br>care team" OR "PHC" )<br>AND AB ( afghanistan<br>OR albania OR algeria<br>OR american samoa OR<br>angola OR "antigua and<br>barbuda" OR antigua OR<br>barbuda OR argentina<br>OR armenia OR<br>armenian OR aruba OR<br>azerbaijan OR bahrain<br>OR bangladesh OR<br>barbados OR republic of<br>belarus OR belarus OR<br>byelarus OR belorussia<br>OR byelorussian OR<br>belize OR british<br>honduras OR benin OR<br>dahomey OR bhutan OR<br>bolivia OR "bosnia and<br>herzegovina" OR bosnia<br>OR herzegovina OR | Limiters - Date of<br>Publication: 20000101-<br>20221231<br>Search modes -<br>Boolean/Phrase | Interface - EBSCOhost<br>Research Databases<br>Search Screen - Advanced<br>Search<br>Database - MEDLINE<br>Complete | 33 |
|-----|----------------------------------------------------------------------------------------------------------------------------------------------------------------------------------------------------------------------------------------------------------------------------------------------------------------------------------------------------------------------------------------------------------------------------------------------------------------------------------------------------------------------------------------------------------------------------------------------------------------------------|----------------------------------------------------------------------------------------------|---------------------------------------------------------------------------------------------------------------------|----|

botswana OR  
bechuanaland OR brazil  
OR brasil OR bulgaria  
OR burkina faso OR  
burkina fasso OR upper  
volta OR burundi OR  
urundi OR cabo verde  
OR cape verde OR  
cambodia OR  
kampuchea OR khmer  
republic OR cameroon  
OR cameron OR  
cameroun OR central  
african republic OR  
ubangi shari OR chad  
OR chile OR china OR  
colombia OR comoros  
OR comoro islands OR  
iles comores OR mayotte  
OR democratic republic  
of the congo OR  
democratic republic  
congo OR congo OR  
zaire OR costa rica OR  
"cote d'ivoire" OR "cote d'  
ivoire" OR cote divoire  
OR cote d ivoire OR ivory  
coast OR croatia OR  
cuba OR cyprus OR  
czech republic OR  
czechoslovakia OR  
djibouti OR french  
somaliland OR dominica  
OR dominican republic  
OR ecuador OR egypt  
OR united arab republic  
OR el salvador OR  
equatorial guinea OR  
spanish guinea OR  
eritrea OR estonia OR  
eswatini OR swaziland  
OR ethiopia OR fiji OR  
gabon OR gabonese  
republic OR gambia OR  
"georgia (republic)" OR  
georgian OR ghana OR  
gold coast OR gibraltar

OR greece OR grenada  
OR guam OR guatemala  
OR guinea OR guinea  
bissau OR guyana OR  
british guiana OR haiti  
OR hispaniola OR  
honduras OR hungary  
OR india OR indonesia  
OR timor OR iran OR  
iraq OR isle of man OR  
jamaica OR jordan OR  
kazakhstan OR kazakh  
OR kenya OR  
“democratic people's  
republic of korea” OR  
republic of korea OR  
north korea OR south  
korea OR korea OR  
kosovo OR kyrgyzstan  
OR kirghizia OR  
kirgizstan OR kyrgyz  
republic OR kirghiz OR  
laos OR lao pdr OR “lao  
people's democratic  
republic” OR latvia OR  
lebanon OR lebanese  
republic OR lesotho OR  
basutoland OR liberia  
OR libya OR libyan arab  
jamahiriya OR lithuania  
OR macau OR macao  
OR republic of north  
macedonia OR  
macedonia OR  
madagascar OR  
malagasy republic OR  
malawi OR nyasaland  
OR malaysia OR malay  
federation OR malaya  
federation OR maldives  
OR indian ocean islands  
OR indian ocean OR mali  
OR malta OR micronesia  
OR federated states of  
micronesia OR kiribati  
OR marshall islands OR  
nauru OR northern

mariana islands OR  
palau OR tuvalu OR  
mauritania OR mauritius  
OR mexico OR moldova  
OR moldovian OR  
mongolia OR  
montenegro OR morocco  
OR ifni OR mozambique  
OR portuguese east  
africa OR myanmar OR  
burma OR namibia OR  
nepal OR netherlands  
antilles OR nicaragua OR  
niger OR nigeria OR  
oman OR muscat OR  
pakistan OR panama OR  
papua new guinea OR  
new guinea OR paraguay  
OR peru OR philippines  
OR philipines OR  
phillipines OR  
phillippines OR poland  
OR "polish people's  
republic" OR portugal OR  
portuguese republic OR  
puerto rico OR romania  
OR russia OR russian  
federation OR ussr OR  
soviet union OR union of  
soviet socialist republics  
OR rwnda OR ruanda  
OR samoa OR pacific  
islands OR polynesia OR  
samoan islands OR  
navigator island OR  
navigator islands OR  
"sao tome and principe"  
OR saudi arabia OR  
senegal OR serbia OR  
seychelles OR sierra  
leone OR slovakia OR  
slovak republic OR  
slovenia OR melanesia  
OR solomon island OR  
solomon islands OR  
norfolk island OR norfolk  
islands OR somalia OR

south africa OR south  
sudan OR sri lanka OR  
ceylon OR "saint kitts  
and nevis" OR "st. kitts  
and nevis" OR saint lucia  
OR "st. lucia" OR "saint  
vincent and the  
grenadines" OR saint  
vincent OR "st. vincent"  
OR grenadines OR  
sudan OR suriname OR  
surinam OR dutch guiana  
OR netherlands guiana  
OR syria OR syrian arab  
republic OR tajikistan OR  
tadjikistan OR  
tadzhikistan OR tadjik  
OR tanzania OR  
tanganyika OR thailand  
OR siam OR timor leste  
OR east timor OR togo  
OR togolese republic OR  
tonga OR "trinidad and  
tobago" OR trinidad OR  
tobago OR tunisia OR  
turkey OR turkmenistan  
OR turkmen OR uganda  
OR ukraine OR uruguay  
OR uzbekistan OR uzbek  
OR vanuatu OR new  
hebrides OR venezuela  
OR vietnam OR viet nam  
OR middle east OR west  
bank OR gaza OR  
palestine OR yemen OR  
yugoslavia OR zambia  
OR zimbabwe OR  
northern rhodesia OR  
global south OR africa  
south of the sahara OR  
sub-saharan africa OR  
subsaharan africa OR  
africa, central OR central  
africa OR africa, northern  
OR north africa OR  
northern africa OR  
magreb OR maghrib OR

sahara OR africa,  
 southern OR southern  
 africa OR africa, eastern  
 OR east africa OR  
 eastern africa OR africa,  
 western OR west africa  
 OR western africa OR  
 west indies OR indian  
 ocean islands OR  
 caribbean OR central  
 america OR latin america  
 OR "south and central  
 america" OR south  
 america OR asia, central  
 OR central asia OR asia,  
 northern OR north asia  
 OR northern asia OR  
 asia, southeastern OR  
 southeastern asia OR  
 south eastern asia OR  
 southeast asia OR south  
 east asia OR asia,  
 western OR western asia  
 OR europe, eastern OR  
 east europe OR eastern  
 europe ) AND (  
 (Research OR Study)  
 N10 "quality  
 improvement" )

|    |                                                                                                                                                                                                                                                                                                                                                                                                                                  |                                                                                                   |                                                                                                                     |    |
|----|----------------------------------------------------------------------------------------------------------------------------------------------------------------------------------------------------------------------------------------------------------------------------------------------------------------------------------------------------------------------------------------------------------------------------------|---------------------------------------------------------------------------------------------------|---------------------------------------------------------------------------------------------------------------------|----|
| S9 | AB ( "primary health care<br>networks* OR MPDSR<br>OR "maternal perinatal<br>death surveillance<br>response" OR "infection<br>prevention control" OR<br>"surgical safety" OR<br>"hand washing" OR<br>"patient safety" ) AND AB<br>( afghanistan OR albania<br>OR algeria OR american<br>samoa OR angola OR<br>"antigua and barbuda"<br>OR antigua OR barbuda<br>OR argentina OR<br>armenia OR armenian<br>OR aruba OR azerbaijan | Limiters - Date of<br>Publication: 20000101-<br>20221231<br>Search modes -<br>SmartText Searching | Interface - EBSCOhost<br>Research Databases<br>Search Screen - Advanced<br>Search<br>Database - MEDLINE<br>Complete | 15 |
|----|----------------------------------------------------------------------------------------------------------------------------------------------------------------------------------------------------------------------------------------------------------------------------------------------------------------------------------------------------------------------------------------------------------------------------------|---------------------------------------------------------------------------------------------------|---------------------------------------------------------------------------------------------------------------------|----|



OR bahrain OR  
bangladesh OR  
barbados OR republic of  
belarus OR belarus OR  
byelarus OR belorussia  
OR byelorussian OR  
belize OR british  
honduras OR benin OR  
dahomey OR bhutan OR  
bolivia OR "bosnia and  
herzegovina" OR bosnia  
OR herzegovina OR  
botswana OR  
bechuanaland OR brazil  
OR brasil OR bulgaria  
OR burkina faso OR  
burkina fasso OR upper  
volta OR burundi OR  
urundi OR cabo verde  
OR cape verde OR  
cambodia OR  
kampuchea OR khmer  
republic OR cameroon  
OR cameron OR  
cameroun OR central  
african republic OR  
ubangi shari OR chad  
OR chile OR china OR  
colombia OR comoros  
OR comoro islands OR  
iles comores OR mayotte  
OR democratic republic  
of the congo OR  
democratic republic  
congo OR congo OR  
zaire OR costa rica OR  
"cote d'ivoire" OR "cote d'  
ivoire" OR cote divoire  
OR cote d ivoire OR ivory  
coast OR croatia OR  
cuba OR cyprus OR  
czech republic OR  
czechoslovakia OR  
djibouti OR french  
somaliland OR dominica  
OR dominican republic  
OR ecuador OR egypt

OR united arab republic  
OR el salvador OR  
equatorial guinea OR  
spanish guinea OR  
eritrea OR estonia OR  
eswatini OR swaziland  
OR ethiopia OR fiji OR  
gabon OR gabonese  
republic OR gambia OR  
"georgia (republic)" OR  
georgian OR ghana OR  
gold coast OR gibraltar  
OR greece OR grenada  
OR guam OR guatemala  
OR guinea OR guinea  
bissau OR guyana OR  
british guiana OR haiti  
OR hispaniola OR  
honduras OR hungary  
OR india OR indonesia  
OR timor OR iran OR  
iraq OR isle of man OR  
jamaica OR jordan OR  
kazakhstan OR kazakh  
OR kenya OR  
"democratic people's  
republic of korea" OR  
republic of korea OR  
north korea OR south  
korea OR korea OR  
kosovo OR kyrgyzstan  
OR kirghizia OR  
kirgizstan OR kyrgyz  
republic OR kirghiz OR  
laos OR lao pdr OR "lao  
people's democratic  
republic" OR latvia OR  
lebanon OR lebanese  
republic OR lesotho OR  
basutoland OR liberia  
OR libya OR libyan arab  
jamahiriya OR lithuania  
OR macau OR macao  
OR republic of north  
macedonia OR  
macedonia OR  
madagascar OR

malagasy republic OR  
malawi OR nyasaland  
OR malaysia OR malay  
federation OR malaya  
federation OR maldives  
OR indian ocean islands  
OR indian ocean OR mali  
OR malta OR micronesia  
OR federated states of  
micronesia OR kiribati  
OR marshall islands OR  
nauru OR northern  
mariana islands OR  
palau OR tuvalu OR  
mauritania OR mauritius  
OR mexico OR moldova  
OR moldovian OR  
mongolia OR  
montenegro OR morocco  
OR ifni OR mozambique  
OR portuguese east  
africa OR myanmar OR  
burma OR namibia OR  
nepal OR netherlands  
antilles OR nicaragua OR  
niger OR nigeria OR  
oman OR muscat OR  
pakistan OR panama OR  
papua new guinea OR  
new guinea OR paraguay  
OR peru OR philippines  
OR philipines OR  
phillippines OR  
phillippines OR poland  
OR "polish people's  
republic" OR portugal OR  
portuguese republic OR  
puerto rico OR romania  
OR russia OR russian  
federation OR ussr OR  
soviet union OR union of  
soviet socialist republics  
OR rwanada OR ruanda  
OR samoa OR pacific  
islands OR polynesia OR  
samoan islands OR  
navigator island OR

navigator islands OR  
"sao tome and principe"  
OR saudi arabia OR  
senegal OR serbia OR  
seychelles OR sierra  
leone OR slovakia OR  
slovak republic OR  
slovenia OR melanesia  
OR solomon island OR  
solomon islands OR  
norfolk island OR norfolk  
islands OR somalia OR  
south africa OR south  
sudan OR sri lanka OR  
ceylon OR "saint kitts  
and nevis" OR "st. kitts  
and nevis" OR saint lucia  
OR "st. lucia" OR "saint  
vincent and the  
grenadines" OR saint  
vincent OR "st. vincent"  
OR grenadines OR  
sudan OR suriname OR  
surinam OR dutch guiana  
OR netherlands guiana  
OR syria OR syrian arab  
republic OR tajikistan OR  
tadjikistan OR  
tadzhikistan OR tadjik  
OR tanzania OR  
tanganyika OR thailand  
OR siam OR timor leste  
OR east timor OR togo  
OR togolese republic OR  
tonga OR "trinidad and  
tobago" OR trinidad OR  
tobago OR tunisia OR  
turkey OR turkmenistan  
OR turkmen OR uganda  
OR ukraine OR uruguay  
OR uzbekistan OR uzbek  
OR vanuatu OR new  
hebrides OR venezuela  
OR vietnam OR viet nam  
OR middle east OR west  
bank OR gaza OR  
palestine OR yemen OR

yugoslavia OR zambia  
 OR zimbabwe OR  
 northern rhodesia OR  
 global south OR africa  
 south of the sahara OR  
 sub-saharan africa OR  
 subsaharan africa OR  
 africa, central OR central  
 africa OR africa, northern  
 OR north africa OR  
 northern africa OR  
 magreb OR maghrib OR  
 sahara OR africa,  
 southern OR southern  
 africa OR africa, eastern  
 OR east africa OR  
 eastern africa OR africa,  
 western OR west africa  
 OR western africa OR  
 west indies OR indian  
 ocean islands OR  
 caribbean OR central  
 america OR latin america  
 OR "south and central  
 america" OR south  
 america OR asia, central  
 OR central asia OR asia,  
 northern OR north asia  
 OR northern asia OR  
 asia, southeastern OR  
 southeastern asia OR  
 south eastern asia OR  
 southeast asia OR south  
 east asia OR asia,  
 western OR western asia  
 OR europe, eastern OR  
 east europe OR eastern  
 europe ) AND ( Research  
 OR Study )

|    |                                                                                                                                                                              |                                       |                                                                                                                     |    |
|----|------------------------------------------------------------------------------------------------------------------------------------------------------------------------------|---------------------------------------|---------------------------------------------------------------------------------------------------------------------|----|
| S8 | AB ( "primary health care<br>networks* OR MPDSR<br>OR "maternal perinatal<br>death surveillance<br>response" OR "infection<br>prevention control" OR<br>"surgical safety" OR | Search modes -<br>SmartText Searching | Interface - EBSCOhost<br>Research Databases<br>Search Screen - Advanced<br>Search<br>Database - MEDLINE<br>Complete | 15 |
|----|------------------------------------------------------------------------------------------------------------------------------------------------------------------------------|---------------------------------------|---------------------------------------------------------------------------------------------------------------------|----|

"hand washing" OR  
"patient safety" ) AND AB  
( afghanistan OR albania  
OR algeria OR american  
samoa OR angola OR  
"antigua and barbuda"  
OR antigua OR barbuda  
OR argentina OR  
armenia OR armenian  
OR aruba OR azerbaijan  
OR bahrain OR  
bangladesh OR  
barbados OR republic of  
belarus OR belarus OR  
byelarus OR belorussia  
OR byelorussian OR  
belize OR british  
honduras OR benin OR  
dahomey OR bhutan OR  
bolivia OR "bosnia and  
herzegovina" OR bosnia  
OR herzegovina OR  
botswana OR  
bechuanaland OR brazil  
OR brasil OR bulgaria  
OR burkina faso OR  
burkina fasso OR upper  
volta OR burundi OR  
urundi OR cabo verde  
OR cape verde OR  
cambodia OR  
kampuchea OR khmer  
republic OR cameroon  
OR cameron OR  
cameroun OR central  
african republic OR  
ubangi shari OR chad  
OR chile OR china OR  
colombia OR comoros  
OR comoro islands OR  
iles comores OR mayotte  
OR democratic republic  
of the congo OR  
democratic republic  
congo OR congo OR  
zaire OR costa rica OR  
"cote d'ivoire" OR "cote d'

ivoire" OR cote d'ivoire  
OR cote d'ivoire OR ivory  
coast OR croatia OR  
cuba OR cyprus OR  
czech republic OR  
czechoslovakia OR  
djibouti OR french  
somaliland OR dominica  
OR dominican republic  
OR ecuador OR egypt  
OR united arab republic  
OR el salvador OR  
equatorial guinea OR  
spanish guinea OR  
eritrea OR estonia OR  
eswatini OR swaziland  
OR ethiopia OR fiji OR  
gabon OR gabonese  
republic OR gambia OR  
"georgia (republic)" OR  
georgian OR ghana OR  
gold coast OR gibraltar  
OR greece OR grenada  
OR guam OR guatemala  
OR guinea OR guinea  
bissau OR guyana OR  
british guiana OR haiti  
OR hispaniola OR  
honduras OR hungary  
OR india OR indonesia  
OR timor OR iran OR  
iraq OR isle of man OR  
jamaica OR jordan OR  
kazakhstan OR kazakh  
OR kenya OR  
"democratic people's  
republic of korea" OR  
republic of korea OR  
north korea OR south  
korea OR korea OR  
kosovo OR kyrgyzstan  
OR kirghizia OR  
kirgizstan OR kyrgyz  
republic OR kirghiz OR  
laos OR lao pdr OR "lao  
people's democratic  
republic" OR latvia OR

lebanon OR lebanese  
republic OR lesotho OR  
basutoland OR liberia  
OR libya OR libyan arab  
jamahiriya OR lithuania  
OR macau OR macao  
OR republic of north  
macedonia OR  
macedonia OR  
madagascar OR  
malagasy republic OR  
malawi OR nyasaland  
OR malaysia OR malay  
federation OR malaya  
federation OR maldives  
OR indian ocean islands  
OR indian ocean OR mali  
OR malta OR micronesia  
OR federated states of  
micronesia OR kiribati  
OR marshall islands OR  
nauru OR northern  
mariana islands OR  
palau OR tuvalu OR  
mauritania OR mauritius  
OR mexico OR moldova  
OR moldovian OR  
mongolia OR  
montenegro OR morocco  
OR ifni OR mozambique  
OR portuguese east  
africa OR myanmar OR  
burma OR namibia OR  
nepal OR netherlands  
antilles OR nicaragua OR  
niger OR nigeria OR  
oman OR muscat OR  
pakistan OR panama OR  
papua new guinea OR  
new guinea OR paraguay  
OR peru OR philippines  
OR philipines OR  
phillippines OR  
phillippines OR poland  
OR "polish people's  
republic" OR portugal OR  
portuguese republic OR



puerto rico OR romania  
OR russia OR russian  
federation OR ussr OR  
soviet union OR union of  
soviet socialist republics  
OR rwanada OR ruanda  
OR samoa OR pacific  
islands OR polynesia OR  
samoan islands OR  
navigator island OR  
navigator islands OR  
"sao tome and principe"  
OR saudi arabia OR  
senegal OR serbia OR  
seychelles OR sierra  
leone OR slovakia OR  
slovak republic OR  
slovenia OR melanesia  
OR solomon island OR  
solomon islands OR  
norfolk island OR norfolk  
islands OR somalia OR  
south africa OR south  
sudan OR sri lanka OR  
ceylon OR "saint kitts  
and nevis" OR "st. kitts  
and nevis" OR saint lucia  
OR "st. lucia" OR "saint  
vincent and the  
grenadines" OR saint  
vincent OR "st. vincent"  
OR grenadines OR  
sudan OR suriname OR  
surinam OR dutch guiana  
OR netherlands guiana  
OR syria OR syrian arab  
republic OR tajikistan OR  
tadjikistan OR  
tadzhikistan OR tadjik  
OR tanzania OR  
tanganyika OR thailand  
OR siam OR timor leste  
OR east timor OR togo  
OR togolese republic OR  
tonga OR "trinidad and  
tobago" OR trinidad OR  
tobago OR tunisia OR

turkey OR turkmenistan  
OR turkmen OR uganda  
OR ukraine OR uruguay  
OR uzbekistan OR uzbek  
OR vanuatu OR new  
hebrides OR venezuela  
OR vietnam OR viet nam  
OR middle east OR west  
bank OR gaza OR  
palestine OR yemen OR  
yugoslavia OR zambia  
OR zimbabwe OR  
northern rhodesia OR  
global south OR africa  
south of the sahara OR  
sub-saharan africa OR  
subsaharan africa OR  
africa, central OR central  
africa OR africa, northern  
OR north africa OR  
northern africa OR  
magreb OR maghrib OR  
sahara OR africa,  
southern OR southern  
africa OR africa, eastern  
OR east africa OR  
eastern africa OR africa,  
western OR west africa  
OR western africa OR  
west indies OR indian  
ocean islands OR  
caribbean OR central  
america OR latin america  
OR "south and central  
america" OR south  
america OR asia, central  
OR central asia OR asia,  
northern OR north asia  
OR northern asia OR  
asia, southeastern OR  
southeastern asia OR  
south eastern asia OR  
southeast asia OR south  
east asia OR asia,  
western OR western asia  
OR europe, eastern OR  
east europe OR eastern

|    |                                                                                                                                                                                                                                                                                                                                                                                                                                                                                                                                                                                                                                                                                                                                                                                                                                                                                                                                       |                                         |                                                                                                               |     |
|----|---------------------------------------------------------------------------------------------------------------------------------------------------------------------------------------------------------------------------------------------------------------------------------------------------------------------------------------------------------------------------------------------------------------------------------------------------------------------------------------------------------------------------------------------------------------------------------------------------------------------------------------------------------------------------------------------------------------------------------------------------------------------------------------------------------------------------------------------------------------------------------------------------------------------------------------|-----------------------------------------|---------------------------------------------------------------------------------------------------------------|-----|
|    | europa ) AND ( Research OR Study )                                                                                                                                                                                                                                                                                                                                                                                                                                                                                                                                                                                                                                                                                                                                                                                                                                                                                                    |                                         |                                                                                                               |     |
| S7 | AB ( ("Health care quality improvement" OR "Quality Improvement" OR QI OR "Quality enhancement") AND (Primary Health Care" OR "Essential health care" OR "Basic Health Care" OR ("Curative OR Rehabilitative OR Prevent* OR Promot* AND health) (Improving Quality OR safety OR effectiveness OR patient-centeredness OR timeliness OR efficiency OR equitable) AND Health* ) AND AB ( afghanistan OR albania OR algeria OR american samoa OR angola OR "antigua and barbuda" OR antigua OR barbuda OR argentina OR armenia OR armenian OR aruba OR azerbaijan OR bahrain OR bangladesh OR barbados OR republic of belarus OR belarus OR byelarus OR belorussia OR byelorussian OR belize OR british honduras OR benin OR dahomey OR bhutan OR bolivia OR "bosnia and herzegovina" OR bosnia OR herzegovina OR botswana OR bechuanaland OR brazil OR brasil OR bulgaria OR burkina faso OR burkina fasso OR upper volta OR burundi OR | Search modes - Find all my search terms | Interface - EBSCOhost<br>Research Databases<br>Search Screen - Advanced Search<br>Database - MEDLINE Complete | 169 |

urundi OR cabo verde  
OR cape verde OR  
cambodia OR  
kampuchea OR khmer  
republic OR cameroon  
OR cameron OR  
cameroun OR central  
african republic OR  
ubangi shari OR chad  
OR chile OR china OR  
colombia OR comoros  
OR comoro islands OR  
iles comores OR mayotte  
OR democratic republic  
of the congo OR  
democratic republic  
congo OR congo OR  
zaire OR costa rica OR  
"cote d'ivoire" OR "cote d'  
ivoire" OR cote divoire  
OR cote d ivoire OR ivory  
coast OR croatia OR  
cuba OR cyprus OR  
czech republic OR  
czechoslovakia OR  
djibouti OR french  
somaliland OR dominica  
OR dominican republic  
OR ecuador OR egypt  
OR united arab republic  
OR el salvador OR  
equatorial guinea OR  
spanish guinea OR  
eritrea OR estonia OR  
eswatini OR swaziland  
OR ethiopia OR fiji OR  
gabon OR gabonese  
republic OR gambia OR  
"georgia (republic)" OR  
georgian OR ghana OR  
gold coast OR gibraltar  
OR greece OR grenada  
OR guam OR guatemala  
OR guinea OR guinea  
bissau OR guyana OR  
british guiana OR haiti  
OR hispaniola OR

honduras OR hungary  
OR india OR indonesia  
OR timor OR iran OR  
iraq OR isle of man OR  
jamaica OR jordan OR  
kazakhstan OR kazakh  
OR kenya OR  
“democratic people's  
republic of korea” OR  
republic of korea OR  
north korea OR south  
korea OR korea OR  
kosovo OR kyrgyzstan  
OR kirghizia OR  
kirgizstan OR kyrgyz  
republic OR kirghiz OR  
laos OR lao pdr OR “lao  
people's democratic  
republic” OR latvia OR  
lebanon OR lebanese  
republic OR lesotho OR  
basutoland OR liberia  
OR libya OR libyan arab  
jamahiriya OR lithuania  
OR macau OR macao  
OR republic of north  
macedonia OR  
macedonia OR  
madagascar OR  
malagasy republic OR  
malawi OR nyasaland  
OR malaysia OR malay  
federation OR malaya  
federation OR maldives  
OR indian ocean islands  
OR indian ocean OR mali  
OR malta OR micronesia  
OR federated states of  
micronesia OR kiribati  
OR marshall islands OR  
nauru OR northern  
mariana islands OR  
palau OR tuvalu OR  
mauritania OR mauritius  
OR mexico OR moldova  
OR moldovian OR  
mongolia OR

montenegro OR morocco  
OR ifni OR mozambique  
OR portuguese east  
africa OR myanmar OR  
burma OR namibia OR  
nepal OR netherlands  
antilles OR nicaragua OR  
niger OR nigeria OR  
oman OR muscat OR  
pakistan OR panama OR  
papua new guinea OR  
new guinea OR paraguay  
OR peru OR philippines  
OR philipines OR  
phillipines OR  
phillippines OR poland  
OR "polish people's  
republic" OR portugal OR  
portuguese republic OR  
puerto rico OR romania  
OR russia OR russian  
federation OR ussr OR  
soviet union OR union of  
soviet socialist republics  
OR rwanada OR ruanda  
OR samoa OR pacific  
islands OR polynesia OR  
samoan islands OR  
navigator island OR  
navigator islands OR  
"sao tome and principe"  
OR saudi arabia OR  
senegal OR serbia OR  
seychelles OR sierra  
leone OR slovakia OR  
slovak republic OR  
slovenia OR melanesia  
OR solomon island OR  
solomon islands OR  
norfolk island OR norfolk  
islands OR somalia OR  
south africa OR south  
sudan OR sri lanka OR  
ceylon OR "saint kitts  
and nevis" OR "st. kitts  
and nevis" OR saint lucia  
OR "st. lucia" OR "saint

vincent and the  
grenadines" OR saint  
vincent OR "st. vincent"  
OR grenadines OR  
sudan OR suriname OR  
surinam OR dutch guiana  
OR netherlands guiana  
OR syria OR syrian arab  
republic OR tajikistan OR  
tadjikistan OR  
tadzhikistan OR tadjik  
OR tanzania OR  
tanganyika OR thailand  
OR siam OR timor leste  
OR east timor OR togo  
OR togolese republic OR  
tonga OR "trinidad and  
tobago" OR trinidad OR  
tobago OR tunisia OR  
turkey OR turkmenistan  
OR turkmen OR uganda  
OR ukraine OR uruguay  
OR uzbekistan OR uzbek  
OR vanuatu OR new  
hebrides OR venezuela  
OR vietnam OR viet nam  
OR middle east OR west  
bank OR gaza OR  
palestine OR yemen OR  
yugoslavia OR zambia  
OR zimbabwe OR  
northern rhodesia OR  
global south OR africa  
south of the sahara OR  
sub-saharan africa OR  
subsaharan africa OR  
africa, central OR central  
africa OR africa, northern  
OR north africa OR  
northern africa OR  
magreb OR maghrib OR  
sahara OR africa,  
southern OR southern  
africa OR africa, eastern  
OR east africa OR  
eastern africa OR africa,  
western OR west africa

OR western africa OR  
 west indies OR indian  
 ocean islands OR  
 caribbean OR central  
 america OR latin america  
 OR "south and central  
 america" OR south  
 america OR asia, central  
 OR central asia OR asia,  
 northern OR north asia  
 OR northern asia OR  
 asia, southeastern OR  
 southeastern asia OR  
 south eastern asia OR  
 southeast asia OR south  
 east asia OR asia,  
 western OR western asia  
 OR europe, eastern OR  
 east europe OR eastern  
 europe )

|    |                                                                                                                                                                                                                                                                                                                                                                                                                                                                                                                                                                                                                                 |                                            |                                                                                                                     |     |
|----|---------------------------------------------------------------------------------------------------------------------------------------------------------------------------------------------------------------------------------------------------------------------------------------------------------------------------------------------------------------------------------------------------------------------------------------------------------------------------------------------------------------------------------------------------------------------------------------------------------------------------------|--------------------------------------------|---------------------------------------------------------------------------------------------------------------------|-----|
| S6 | AB ( Barrier* OR<br>limitation* OR constraint*<br>OR enabler* OR<br>promoter* OR facilitator*<br>OR Attitude* OR belief*<br>OR practice* OR<br>knowledge* OR<br>perception* OR<br>perspective* OR<br>behaviour* OR culture<br>OR motivation OR beliefs<br>OR value* OR factor* )<br>AND AB ( afghanistan<br>OR albania OR algeria<br>OR american samoa OR<br>angola OR "antigua and<br>barbuda" OR antigua OR<br>barbuda OR argentina<br>OR armenia OR<br>armenian OR aruba OR<br>azerbaijan OR bahrain<br>OR bangladesh OR<br>barbados OR republic of<br>belarus OR belarus OR<br>byelarus OR belorussia<br>OR byelorussian OR | Search modes - Find all<br>my search terms | Interface - EBSCOhost<br>Research Databases<br>Search Screen - Advanced<br>Search<br>Database - MEDLINE<br>Complete | 405 |
|----|---------------------------------------------------------------------------------------------------------------------------------------------------------------------------------------------------------------------------------------------------------------------------------------------------------------------------------------------------------------------------------------------------------------------------------------------------------------------------------------------------------------------------------------------------------------------------------------------------------------------------------|--------------------------------------------|---------------------------------------------------------------------------------------------------------------------|-----|



belize OR british  
honduras OR benin OR  
dahomey OR bhutan OR  
bolivia OR "bosnia and  
herzegovina" OR bosnia  
OR herzegovina OR  
botswana OR  
bechuanaland OR brazil  
OR brasil OR bulgaria  
OR burkina faso OR  
burkina fasso OR upper  
volta OR burundi OR  
urundi OR cabo verde  
OR cape verde OR  
cambodia OR  
kampuchea OR khmer  
republic OR cameroon  
OR cameron OR  
cameroun OR central  
african republic OR  
ubangi shari OR chad  
OR chile OR china OR  
colombia OR comoros  
OR comoro islands OR  
iles comores OR mayotte  
OR democratic republic  
of the congo OR  
democratic republic  
congo OR congo OR  
zaire OR costa rica OR  
"cote d'ivoire" OR "cote d'  
ivoire" OR cote divoire  
OR cote d ivoire OR ivory  
coast OR croatia OR  
cuba OR cyprus OR  
czech republic OR  
czechoslovakia OR  
djibouti OR french  
somaliland OR dominica  
OR dominican republic  
OR ecuador OR egypt  
OR united arab republic  
OR el salvador OR  
equatorial guinea OR  
spanish guinea OR  
eritrea OR estonia OR  
eswatini OR swaziland

OR ethiopia OR fiji OR  
gabon OR gabonese  
republic OR gambia OR  
"georgia (republic)" OR  
georgian OR ghana OR  
gold coast OR gibraltar  
OR greece OR grenada  
OR guam OR guatemala  
OR guinea OR guinea  
bissau OR guyana OR  
british guiana OR haiti  
OR hispaniola OR  
honduras OR hungary  
OR india OR indonesia  
OR timor OR iran OR  
iraq OR isle of man OR  
jamaica OR jordan OR  
kazakhstan OR kazakh  
OR kenya OR  
"democratic people's  
republic of korea" OR  
republic of korea OR  
north korea OR south  
korea OR korea OR  
kosovo OR kyrgyzstan  
OR kirghizia OR  
kirgizstan OR kyrgyz  
republic OR kirghiz OR  
laos OR lao pdr OR "lao  
people's democratic  
republic" OR latvia OR  
lebanon OR lebanese  
republic OR lesotho OR  
basutoland OR liberia  
OR libya OR libyan arab  
jamahiriya OR lithuania  
OR macau OR macao  
OR republic of north  
macedonia OR  
macedonia OR  
madagascar OR  
malagasy republic OR  
malawi OR nyasaland  
OR malaysia OR malay  
federation OR malaya  
federation OR maldives  
OR indian ocean islands

OR indian ocean OR mali  
OR malta OR micronesia  
OR federated states of  
micronesia OR kiribati  
OR marshall islands OR  
nauru OR northern  
mariana islands OR  
palau OR tuvalu OR  
mauritania OR mauritius  
OR mexico OR moldova  
OR moldovian OR  
mongolia OR  
montenegro OR morocco  
OR ifni OR mozambique  
OR portuguese east  
africa OR myanmar OR  
burma OR namibia OR  
nepal OR netherlands  
antilles OR nicaragua OR  
niger OR nigeria OR  
oman OR muscat OR  
pakistan OR panama OR  
papua new guinea OR  
new guinea OR paraguay  
OR peru OR philippines  
OR philipines OR  
phillippines OR  
phillippines OR poland  
OR "polish people's  
republic" OR portugal OR  
portuguese republic OR  
puerto rico OR romania  
OR russia OR russian  
federation OR ussr OR  
soviet union OR union of  
soviet socialist republics  
OR rwnda OR ruanda  
OR samoa OR pacific  
islands OR polynesia OR  
samoan islands OR  
navigator island OR  
navigator islands OR  
"sao tome and principe"  
OR saudi arabia OR  
senegal OR serbia OR  
seychelles OR sierra  
leone OR slovakia OR

slovak republic OR  
slovenia OR melanesia  
OR solomon island OR  
solomon islands OR  
norfolk island OR norfolk  
islands OR somalia OR  
south africa OR south  
sudan OR sri lanka OR  
ceylon OR "saint kitts  
and nevis" OR "st. kitts  
and nevis" OR saint lucia  
OR "st. lucia" OR "saint  
vincent and the  
grenadines" OR saint  
vincent OR "st. vincent"  
OR grenadines OR  
sudan OR suriname OR  
surinam OR dutch guiana  
OR netherlands guiana  
OR syria OR syrian arab  
republic OR tajikistan OR  
tadjikistan OR  
tadzhikistan OR tadzhik  
OR tanzania OR  
tanganyika OR thailand  
OR siam OR timor leste  
OR east timor OR togo  
OR togolese republic OR  
tonga OR "trinidad and  
tobago" OR trinidad OR  
tobago OR tunisia OR  
turkey OR turkmenistan  
OR turkmen OR uganda  
OR ukraine OR uruguay  
OR uzbekistan OR uzbek  
OR vanuatu OR new  
hebrides OR venezuela  
OR vietnam OR viet nam  
OR middle east OR west  
bank OR gaza OR  
palestine OR yemen OR  
yugoslavia OR zambia  
OR zimbabwe OR  
northern rhodesia OR  
global south OR africa  
south of the sahara OR  
sub-saharan africa OR

subsaharan africa OR  
 africa, central OR central  
 africa OR africa, northern  
 OR north africa OR  
 northern africa OR  
 magreb OR maghrib OR  
 sahara OR africa,  
 southern OR southern  
 africa OR africa, eastern  
 OR east africa OR  
 eastern africa OR africa,  
 western OR west africa  
 OR western africa OR  
 west indies OR indian  
 ocean islands OR  
 caribbean OR central  
 america OR latin america  
 OR "south and central  
 america" OR south  
 america OR asia, central  
 OR central asia OR asia,  
 northern OR north asia  
 OR northern asia OR  
 asia, southeastern OR  
 southeastern asia OR  
 south eastern asia OR  
 southeast asia OR south  
 east asia OR asia,  
 western OR western asia  
 OR europe, eastern OR  
 east europe OR eastern  
 europe ) AND AB "quality  
 improvement" N20 health

|    |                                                                                                                                                                                                                                                                                                          |                                            |                                                                                                                     |     |
|----|----------------------------------------------------------------------------------------------------------------------------------------------------------------------------------------------------------------------------------------------------------------------------------------------------------|--------------------------------------------|---------------------------------------------------------------------------------------------------------------------|-----|
| S5 | AB ( Barrier* OR<br>limitation* OR constraint*<br>OR enabler* OR<br>promoter* OR facilitator*<br>OR Attitude* OR belief*<br>OR practice* OR<br>knowledge* OR<br>perception* OR<br>perspective* OR<br>behaviour* OR culture<br>OR motivation OR beliefs<br>OR value* OR factor* )<br>AND AB ( afghanistan | Search modes - Find all<br>my search terms | Interface - EBSCOhost<br>Research Databases<br>Search Screen - Advanced<br>Search<br>Database - MEDLINE<br>Complete | 285 |
|----|----------------------------------------------------------------------------------------------------------------------------------------------------------------------------------------------------------------------------------------------------------------------------------------------------------|--------------------------------------------|---------------------------------------------------------------------------------------------------------------------|-----|

OR albania OR algeria  
OR american samoa OR  
angola OR "antigua and  
barbuda" OR antigua OR  
barbuda OR argentina  
OR armenia OR  
armenian OR aruba OR  
azerbaijan OR bahrain  
OR bangladesh OR  
barbados OR republic of  
belarus OR belarus OR  
byelarus OR belorussia  
OR byelorussian OR  
belize OR british  
honduras OR benin OR  
dahomey OR bhutan OR  
bolivia OR "bosnia and  
herzegovina" OR bosnia  
OR herzegovina OR  
botswana OR  
bechuanaland OR brazil  
OR brasil OR bulgaria  
OR burkina faso OR  
burkina fasso OR upper  
volta OR burundi OR  
urundi OR cabo verde  
OR cape verde OR  
cambodia OR  
kampuchea OR khmer  
republic OR cameroon  
OR cameron OR  
cameroun OR central  
african republic OR  
ubangi shari OR chad  
OR chile OR china OR  
colombia OR comoros  
OR comoro islands OR  
iles comores OR mayotte  
OR democratic republic  
of the congo OR  
democratic republic  
congo OR congo OR  
zaire OR costa rica OR  
"cote d'ivoire" OR "cote d'  
ivoire" OR cote divoire  
OR cote d ivoire OR ivory  
coast OR croatia OR

cuba OR cyprus OR  
czech republic OR  
czechoslovakia OR  
djibouti OR french  
somaliland OR dominica  
OR dominican republic  
OR ecuador OR egypt  
OR united arab republic  
OR el salvador OR  
equatorial guinea OR  
spanish guinea OR  
eritrea OR estonia OR  
eswatini OR swaziland  
OR ethiopia OR fiji OR  
gabon OR gabonese  
republic OR gambia OR  
"georgia (republic)" OR  
georgian OR ghana OR  
gold coast OR gibraltar  
OR greece OR grenada  
OR guam OR guatemala  
OR guinea OR guinea  
bissau OR guyana OR  
british guiana OR haiti  
OR hispaniola OR  
honduras OR hungary  
OR india OR indonesia  
OR timor OR iran OR  
iraq OR isle of man OR  
jamaica OR jordan OR  
kazakhstan OR kazakh  
OR kenya OR  
"democratic people's  
republic of korea" OR  
republic of korea OR  
north korea OR south  
korea OR korea OR  
kosovo OR kyrgyzstan  
OR kirghizia OR  
kirgizstan OR kyrgyz  
republic OR kirghiz OR  
laos OR lao pdr OR "lao  
people's democratic  
republic" OR latvia OR  
lebanon OR lebanese  
republic OR lesotho OR  
basutoland OR liberia

OR libya OR libyan arab  
jamahiriya OR lithuania  
OR macau OR macao  
OR republic of north  
macedonia OR  
macedonia OR  
madagascar OR  
malagasy republic OR  
malawi OR nyasaland  
OR malaysia OR malay  
federation OR malaya  
federation OR maldives  
OR indian ocean islands  
OR indian ocean OR mali  
OR malta OR micronesia  
OR federated states of  
micronesia OR kiribati  
OR marshall islands OR  
nauru OR northern  
mariana islands OR  
palau OR tuvalu OR  
mauritania OR mauritius  
OR mexico OR moldova  
OR moldovian OR  
mongolia OR  
montenegro OR morocco  
OR ifni OR mozambique  
OR portuguese east  
africa OR myanmar OR  
burma OR namibia OR  
nepal OR netherlands  
antilles OR nicaragua OR  
niger OR nigeria OR  
oman OR muscat OR  
pakistan OR panama OR  
papua new guinea OR  
new guinea OR paraguay  
OR peru OR philippines  
OR philipines OR  
phillipines OR  
phillippines OR poland  
OR "polish people's  
republic" OR portugal OR  
portuguese republic OR  
puerto rico OR romania  
OR russia OR russian  
federation OR ussr OR



soviet union OR union of  
soviet socialist republics  
OR randa OR ruanda  
OR samoa OR pacific  
islands OR polynesia OR  
samoan islands OR  
navigator island OR  
navigator islands OR  
"sao tome and principe"  
OR saudi arabia OR  
senegal OR serbia OR  
seychelles OR sierra  
leone OR slovakia OR  
slovak republic OR  
slovenia OR melanesia  
OR solomon island OR  
solomon islands OR  
norfolk island OR norfolk  
islands OR somalia OR  
south africa OR south  
sudan OR sri lanka OR  
ceylon OR "saint kitts  
and nevis" OR "st. kitts  
and nevis" OR saint lucia  
OR "st. lucia" OR "saint  
vincent and the  
grenadines" OR saint  
vincent OR "st. vincent"  
OR grenadines OR  
sudan OR suriname OR  
surinam OR dutch guiana  
OR netherlands guiana  
OR syria OR syrian arab  
republic OR tajikistan OR  
tadjikistan OR  
tadzhikistan OR tadhik  
OR tanzania OR  
tanganyika OR thailand  
OR siam OR timor leste  
OR east timor OR togo  
OR togolese republic OR  
tonga OR "trinidad and  
tobago" OR trinidad OR  
tobago OR tunisia OR  
turkey OR turkmenistan  
OR turkmen OR uganda  
OR ukraine OR uruguay

OR uzbekistan OR uzbek  
OR vanuatu OR new  
hebrides OR venezuela  
OR vietnam OR viet nam  
OR middle east OR west  
bank OR gaza OR  
palestine OR yemen OR  
yugoslavia OR zambia  
OR zimbabwe OR  
northern rhodesia OR  
global south OR africa  
south of the sahara OR  
sub-saharan africa OR  
subsaharan africa OR  
africa, central OR central  
africa OR africa, northern  
OR north africa OR  
northern africa OR  
magreb OR maghrib OR  
sahara OR africa,  
southern OR southern  
africa OR africa, eastern  
OR east africa OR  
eastern africa OR africa,  
western OR west africa  
OR western africa OR  
west indies OR indian  
ocean islands OR  
caribbean OR central  
america OR latin america  
OR "south and central  
america" OR south  
america OR asia, central  
OR central asia OR asia,  
northern OR north asia  
OR northern asia OR  
asia, southeastern OR  
southeastern asia OR  
south eastern asia OR  
southeast asia OR south  
east asia OR asia,  
western OR western asia  
OR europe, eastern OR  
east europe OR eastern  
europe ) AND AB "quality  
improvement" N10 health

|    |                                                                                                                                                                                                                                                                                                                                                                                                                                                                                                                                                                                                                                                                                                                                                                                                                                                                                                                                                                                                                                                                                                                                                                                                 |                                                     |                                                                                                                                      |     |
|----|-------------------------------------------------------------------------------------------------------------------------------------------------------------------------------------------------------------------------------------------------------------------------------------------------------------------------------------------------------------------------------------------------------------------------------------------------------------------------------------------------------------------------------------------------------------------------------------------------------------------------------------------------------------------------------------------------------------------------------------------------------------------------------------------------------------------------------------------------------------------------------------------------------------------------------------------------------------------------------------------------------------------------------------------------------------------------------------------------------------------------------------------------------------------------------------------------|-----------------------------------------------------|--------------------------------------------------------------------------------------------------------------------------------------|-----|
| S4 | <p>AB ( Barrier* OR<br/> limitation* OR constraint*<br/> OR enabler* OR<br/> promoter* OR facilitator*<br/> OR Attitude* OR belief*<br/> OR practice* OR<br/> knowledge* OR<br/> perception* OR<br/> perspective* OR<br/> behaviour* OR culture<br/> OR motivation OR beliefs<br/> OR value* OR factor* )<br/> AND AB ( afghanistan<br/> OR albania OR algeria<br/> OR american samoa OR<br/> angola OR "antigua and<br/> barbuda" OR antigua OR<br/> barbuda OR argentina<br/> OR armenia OR<br/> armenian OR aruba OR<br/> azerbaijan OR bahrain<br/> OR bangladesh OR<br/> barbados OR republic of<br/> belarus OR belarus OR<br/> byelarus OR belorussia<br/> OR byelorussian OR<br/> belize OR british<br/> honduras OR benin OR<br/> dahomey OR bhutan OR<br/> bolivia OR "bosnia and<br/> herzegovina" OR bosnia<br/> OR herzegovina OR<br/> botswana OR<br/> bechuanaland OR brazil<br/> OR brasil OR bulgaria<br/> OR burkina faso OR<br/> burkina fasso OR upper<br/> volta OR burundi OR<br/> urundi OR cabo verde<br/> OR cape verde OR<br/> cambodia OR<br/> kampuchea OR khmer<br/> republic OR cameroon<br/> OR cameron OR<br/> cameroun OR central<br/> african republic OR</p> | <p>Search modes - Find all<br/> my search terms</p> | <p>Interface - EBSCOhost<br/> Research Databases<br/> Search Screen - Advanced<br/> Search<br/> Database - MEDLINE<br/> Complete</p> | 167 |
|----|-------------------------------------------------------------------------------------------------------------------------------------------------------------------------------------------------------------------------------------------------------------------------------------------------------------------------------------------------------------------------------------------------------------------------------------------------------------------------------------------------------------------------------------------------------------------------------------------------------------------------------------------------------------------------------------------------------------------------------------------------------------------------------------------------------------------------------------------------------------------------------------------------------------------------------------------------------------------------------------------------------------------------------------------------------------------------------------------------------------------------------------------------------------------------------------------------|-----------------------------------------------------|--------------------------------------------------------------------------------------------------------------------------------------|-----|

ubangi shari OR chad  
OR chile OR china OR  
colombia OR comoros  
OR comoro islands OR  
iles comores OR mayotte  
OR democratic republic  
of the congo OR  
democratic republic  
congo OR congo OR  
zaire OR costa rica OR  
"cote d'ivoire" OR "cote d'  
ivoire" OR cote divoire  
OR cote d ivoire OR ivory  
coast OR croatia OR  
cuba OR cyprus OR  
czech republic OR  
czechoslovakia OR  
djibouti OR french  
somaliland OR dominica  
OR dominican republic  
OR ecuador OR egypt  
OR united arab republic  
OR el salvador OR  
equatorial guinea OR  
spanish guinea OR  
eritrea OR estonia OR  
eswatini OR swaziland  
OR ethiopia OR fiji OR  
gabon OR gabonese  
republic OR gambia OR  
"georgia (republic)" OR  
georgian OR ghana OR  
gold coast OR gibraltar  
OR greece OR grenada  
OR guam OR guatemala  
OR guinea OR guinea  
bissau OR guyana OR  
british guiana OR haiti  
OR hispaniola OR  
honduras OR hungary  
OR india OR indonesia  
OR timor OR iran OR  
iraq OR isle of man OR  
jamaica OR jordan OR  
kazakhstan OR kazakh  
OR kenya OR  
"democratic people's

republic of korea" OR  
republic of korea OR  
north korea OR south  
korea OR korea OR  
kosovo OR kyrgyzstan  
OR kirghizia OR  
kirgizstan OR kyrgyz  
republic OR kirghiz OR  
laos OR lao pdr OR "lao  
people's democratic  
republic" OR latvia OR  
lebanon OR lebanese  
republic OR lesotho OR  
basutoland OR liberia  
OR libya OR libyan arab  
jamahiriya OR lithuania  
OR macau OR macao  
OR republic of north  
macedonia OR  
macedonia OR  
madagascar OR  
malagasy republic OR  
malawi OR nyasaland  
OR malaysia OR malay  
federation OR malaya  
federation OR maldives  
OR indian ocean islands  
OR indian ocean OR mali  
OR malta OR micronesia  
OR federated states of  
micronesia OR kiribati  
OR marshall islands OR  
nauru OR northern  
mariana islands OR  
palau OR tuvalu OR  
mauritania OR mauritius  
OR mexico OR moldova  
OR moldovian OR  
mongolia OR  
montenegro OR morocco  
OR ifni OR mozambique  
OR portuguese east  
africa OR myanmar OR  
burma OR namibia OR  
nepal OR netherlands  
antilles OR nicaragua OR  
niger OR nigeria OR

oman OR muscat OR  
pakistan OR panama OR  
papua new guinea OR  
new guinea OR paraguay  
OR peru OR philippines  
OR philipines OR  
phillippines OR  
phillippines OR poland  
OR "polish people's  
republic" OR portugal OR  
portuguese republic OR  
puerto rico OR romania  
OR russia OR russian  
federation OR ussr OR  
soviet union OR union of  
soviet socialist republics  
OR rwanada OR ruanda  
OR samoa OR pacific  
islands OR polynesia OR  
samoan islands OR  
navigator island OR  
navigator islands OR  
"sao tome and principe"  
OR saudi arabia OR  
senegal OR serbia OR  
seychelles OR sierra  
leone OR slovakia OR  
slovak republic OR  
slovenia OR melanesia  
OR solomon island OR  
solomon islands OR  
norfolk island OR norfolk  
islands OR somalia OR  
south africa OR south  
sudan OR sri lanka OR  
ceylon OR "saint kitts  
and nevis" OR "st. kitts  
and nevis" OR saint lucia  
OR "st. lucia" OR "saint  
vincent and the  
grenadines" OR saint  
vincent OR "st. vincent"  
OR grenadines OR  
sudan OR suriname OR  
surinam OR dutch guiana  
OR netherlands guiana  
OR syria OR syrian arab

republic OR tajikistan OR  
tadjikistan OR  
tadzhikistan OR tadjhik  
OR tanzania OR  
tanganyika OR thailand  
OR siam OR timor leste  
OR east timor OR togo  
OR togolese republic OR  
tonga OR "trinidad and  
tobago" OR trinidad OR  
tobago OR tunisia OR  
turkey OR turkmenistan  
OR turkmen OR uganda  
OR ukraine OR uruguay  
OR uzbekistan OR uzbek  
OR vanuatu OR new  
hebrides OR venezuela  
OR vietnam OR viet nam  
OR middle east OR west  
bank OR gaza OR  
palestine OR yemen OR  
yugoslavia OR zambia  
OR zimbabwe OR  
northern rhodesia OR  
global south OR africa  
south of the sahara OR  
sub-saharan africa OR  
subsaharan africa OR  
africa, central OR central  
africa OR africa, northern  
OR north africa OR  
northern africa OR  
magreb OR maghrib OR  
sahara OR africa,  
southern OR southern  
africa OR africa, eastern  
OR east africa OR  
eastern africa OR africa,  
western OR west africa  
OR western africa OR  
west indies OR indian  
ocean islands OR  
caribbean OR central  
america OR latin america  
OR "south and central  
america" OR south  
america OR asia, central

OR central asia OR asia,  
 northern OR north asia  
 OR northern asia OR  
 asia, southeastern OR  
 southeastern asia OR  
 south eastern asia OR  
 southeast asia OR south  
 east asia OR asia,  
 western OR western asia  
 OR europe, eastern OR  
 east europe OR eastern  
 europe ) AND AB "quality  
 improvement" N5 health

|    |                                                                                                                                                                                                                                                                                                                                                                                                                                                                                                                                                                                                                                                                                                                                                                                                                                                                                                                                                                                                                                                                                                               |                                            |                                                                                                                     |     |
|----|---------------------------------------------------------------------------------------------------------------------------------------------------------------------------------------------------------------------------------------------------------------------------------------------------------------------------------------------------------------------------------------------------------------------------------------------------------------------------------------------------------------------------------------------------------------------------------------------------------------------------------------------------------------------------------------------------------------------------------------------------------------------------------------------------------------------------------------------------------------------------------------------------------------------------------------------------------------------------------------------------------------------------------------------------------------------------------------------------------------|--------------------------------------------|---------------------------------------------------------------------------------------------------------------------|-----|
| S3 | <p>AB ( survey OR<br/>         questionnaire OR<br/>         Observation OR<br/>         Interview OR "Focus<br/>         Group" OR Survey OR<br/>         Questionnaire OR "Case<br/>         Study" OR KII OR IDI OR<br/>         FGD OR "Participant<br/>         observation" OR OR<br/>         "Group Interview" OR<br/>         Ethnography OR<br/>         "Grounded theory" OR<br/>         phenomenological OR<br/>         "qualitative content<br/>         analysis" OR "Realist<br/>         Evaluation" ) AND AB ( afghanistan OR albania<br/>         OR algeria OR american<br/>         samoa OR angola OR<br/>         "antigua and barbuda"<br/>         OR antigua OR barbuda<br/>         OR argentina OR<br/>         armenia OR armenian<br/>         OR aruba OR azerbaijan<br/>         OR bahrain OR<br/>         bangladesh OR<br/>         barbados OR republic of<br/>         belarus OR belarus OR<br/>         byelarus OR belorussia<br/>         OR byelorussian OR<br/>         belize OR british<br/>         honduras OR benin OR<br/>         dahomey OR bhutan OR</p> | Search modes - Find all<br>my search terms | Interface - EBSCOhost<br>Research Databases<br>Search Screen - Advanced<br>Search<br>Database - MEDLINE<br>Complete | 107 |
|----|---------------------------------------------------------------------------------------------------------------------------------------------------------------------------------------------------------------------------------------------------------------------------------------------------------------------------------------------------------------------------------------------------------------------------------------------------------------------------------------------------------------------------------------------------------------------------------------------------------------------------------------------------------------------------------------------------------------------------------------------------------------------------------------------------------------------------------------------------------------------------------------------------------------------------------------------------------------------------------------------------------------------------------------------------------------------------------------------------------------|--------------------------------------------|---------------------------------------------------------------------------------------------------------------------|-----|



bolivia OR "bosnia and herzegovina" OR bosnia OR herzegovina OR botswana OR bechuanaland OR brazil OR brasil OR bulgaria OR burkina faso OR burkina fasso OR upper volta OR burundi OR urundi OR cabo verde OR cape verde OR cambodia OR kampuhea OR khmer republic OR cameroon OR cameron OR cameroun OR central african republic OR ubangi shari OR chad OR chile OR china OR colombia OR comoros OR comoro islands OR iles comores OR mayotte OR democratic republic of the congo OR democratic republic congo OR congo OR zaire OR costa rica OR "cote d'ivoire" OR "cote d'ivoire" OR cote divoire OR cote d ivoire OR ivory coast OR croatia OR cuba OR cyprus OR czech republic OR czechoslovakia OR djibouti OR french somaliland OR dominica OR dominican republic OR ecuador OR egypt OR united arab republic OR el salvador OR equatorial guinea OR spanish guinea OR eritrea OR estonia OR eswatini OR swaziland OR ethiopia OR fiji OR gabon OR gabonese republic OR gambia OR

“georgia (republic)” OR  
georgian OR ghana OR  
gold coast OR gibraltar  
OR greece OR grenada  
OR guam OR guatemala  
OR guinea OR guinea  
bissau OR guyana OR  
british guiana OR haiti  
OR hispaniola OR  
honduras OR hungary  
OR india OR indonesia  
OR timor OR iran OR  
iraq OR isle of man OR  
jamaica OR jordan OR  
kazakhstan OR kazakh  
OR kenya OR  
“democratic people's  
republic of korea” OR  
republic of korea OR  
north korea OR south  
korea OR korea OR  
kosovo OR kyrgyzstan  
OR kirghizia OR  
kirgizstan OR kyrgyz  
republic OR kirghiz OR  
laos OR lao pdr OR “lao  
people's democratic  
republic” OR latvia OR  
lebanon OR lebanese  
republic OR lesotho OR  
basutoland OR liberia  
OR libya OR libyan arab  
jamahiriya OR lithuania  
OR macau OR macao  
OR republic of north  
macedonia OR  
macedonia OR  
madagascar OR  
malagasy republic OR  
malawi OR nyasaland  
OR malaysia OR malay  
federation OR malaya  
federation OR maldives  
OR indian ocean islands  
OR indian ocean OR mali  
OR malta OR micronesia  
OR federated states of

micronesia OR kiribati  
OR marshall islands OR  
nauru OR northern  
mariana islands OR  
palau OR tuvalu OR  
mauritania OR mauritius  
OR mexico OR moldova  
OR moldovian OR  
mongolia OR  
montenegro OR morocco  
OR ifni OR mozambique  
OR portuguese east  
africa OR myanmar OR  
burma OR namibia OR  
nepal OR netherlands  
antilles OR nicaragua OR  
niger OR nigeria OR  
oman OR muscat OR  
pakistan OR panama OR  
papua new guinea OR  
new guinea OR paraguay  
OR peru OR philippines  
OR philipines OR  
phillippines OR  
phillippines OR poland  
OR "polish people's  
republic" OR portugal OR  
portuguese republic OR  
puerto rico OR romania  
OR russia OR russian  
federation OR ussr OR  
soviet union OR union of  
soviet socialist republics  
OR rwnda OR ruanda  
OR samoa OR pacific  
islands OR polynesia OR  
samoan islands OR  
navigator island OR  
navigator islands OR  
"sao tome and principe"  
OR saudi arabia OR  
senegal OR serbia OR  
seychelles OR sierra  
leone OR slovakia OR  
slovak republic OR  
slovenia OR melanesia  
OR solomon island OR

solomon islands OR  
norfolk island OR norfolk  
islands OR somalia OR  
south africa OR south  
sudan OR sri lanka OR  
ceylon OR "saint kitts  
and nevis" OR "st. kitts  
and nevis" OR saint lucia  
OR "st. lucia" OR "saint  
vincent and the  
grenadines" OR saint  
vincent OR "st. vincent"  
OR grenadines OR  
sudan OR suriname OR  
surinam OR dutch guiana  
OR netherlands guiana  
OR syria OR syrian arab  
republic OR tajikistan OR  
tadjikistan OR  
tadzhikistan OR tadzhik  
OR tanzania OR  
tanganyika OR thailand  
OR siam OR timor leste  
OR east timor OR togo  
OR togolese republic OR  
tonga OR "trinidad and  
tobago" OR trinidad OR  
tobago OR tunisia OR  
turkey OR turkmenistan  
OR turkmen OR uganda  
OR ukraine OR uruguay  
OR uzbekistan OR uzbek  
OR vanuatu OR new  
hebrides OR venezuela  
OR vietnam OR viet nam  
OR middle east OR west  
bank OR gaza OR  
palestine OR yemen OR  
yugoslavia OR zambia  
OR zimbabwe OR  
northern rhodesia OR  
global south OR africa  
south of the sahara OR  
sub-saharan africa OR  
subsaharan africa OR  
africa, central OR central  
africa OR africa, northern

OR north africa OR  
 northern africa OR  
 magreb OR maghrib OR  
 sahara OR africa,  
 southern OR southern  
 africa OR africa, eastern  
 OR east africa OR  
 eastern africa OR africa,  
 western OR west africa  
 OR western africa OR  
 west indies OR indian  
 ocean islands OR  
 caribbean OR central  
 america OR latin america  
 OR "south and central  
 america" OR south  
 america OR asia, central  
 OR central asia OR asia,  
 northern OR north asia  
 OR northern asia OR  
 asia, southeastern OR  
 southeastern asia OR  
 south eastern asia OR  
 southeast asia OR south  
 east asia OR asia,  
 western OR western asia  
 OR europe, eastern OR  
 east europe OR eastern  
 europe ) AND AB "quality  
 improvement" N5 health

|    |                                                                                                                                                                                                                                                                                                                                                                                              |                                            |                                                                                                                     |     |
|----|----------------------------------------------------------------------------------------------------------------------------------------------------------------------------------------------------------------------------------------------------------------------------------------------------------------------------------------------------------------------------------------------|--------------------------------------------|---------------------------------------------------------------------------------------------------------------------|-----|
| S2 | AB ( "qual* research" OR<br>"mixed methods" ) AND<br>AB ( afghanistan OR<br>albania OR algeria OR<br>american samoa OR<br>angola OR "antigua and<br>barbuda" OR antigua OR<br>barbuda OR argentina<br>OR armenia OR<br>armenian OR aruba OR<br>azerbaijan OR bahrain<br>OR bangladesh OR<br>barbados OR republic of<br>belarus OR belarus OR<br>byelarus OR belorussia<br>OR byelorussian OR | Search modes - Find all<br>my search terms | Interface - EBSCOhost<br>Research Databases<br>Search Screen - Advanced<br>Search<br>Database - MEDLINE<br>Complete | 323 |
|----|----------------------------------------------------------------------------------------------------------------------------------------------------------------------------------------------------------------------------------------------------------------------------------------------------------------------------------------------------------------------------------------------|--------------------------------------------|---------------------------------------------------------------------------------------------------------------------|-----|

belize OR british  
honduras OR benin OR  
dahomey OR bhutan OR  
bolivia OR "bosnia and  
herzegovina" OR bosnia  
OR herzegovina OR  
botswana OR  
bechuanaland OR brazil  
OR brasil OR bulgaria  
OR burkina faso OR  
burkina fasso OR upper  
volta OR burundi OR  
urundi OR cabo verde  
OR cape verde OR  
cambodia OR  
kampuchea OR khmer  
republic OR cameroon  
OR cameron OR  
cameroun OR central  
african republic OR  
ubangi shari OR chad  
OR chile OR china OR  
colombia OR comoros  
OR comoro islands OR  
iles comores OR mayotte  
OR democratic republic  
of the congo OR  
democratic republic  
congo OR congo OR  
zaire OR costa rica OR  
"cote d'ivoire" OR "cote d'  
ivoire" OR cote divoire  
OR cote d ivoire OR ivory  
coast OR croatia OR  
cuba OR cyprus OR  
czech republic OR  
czechoslovakia OR  
djibouti OR french  
somaliland OR dominica  
OR dominican republic  
OR ecuador OR egypt  
OR united arab republic  
OR el salvador OR  
equatorial guinea OR  
spanish guinea OR  
eritrea OR estonia OR  
eswatini OR swaziland

OR ethiopia OR fiji OR  
gabon OR gabonese  
republic OR gambia OR  
"georgia (republic)" OR  
georgian OR ghana OR  
gold coast OR gibraltar  
OR greece OR grenada  
OR guam OR guatemala  
OR guinea OR guinea  
bissau OR guyana OR  
british guiana OR haiti  
OR hispaniola OR  
honduras OR hungary  
OR india OR indonesia  
OR timor OR iran OR  
iraq OR isle of man OR  
jamaica OR jordan OR  
kazakhstan OR kazakh  
OR kenya OR  
"democratic people's  
republic of korea" OR  
republic of korea OR  
north korea OR south  
korea OR korea OR  
kosovo OR kyrgyzstan  
OR kirghizia OR  
kirgizstan OR kyrgyz  
republic OR kirghiz OR  
laos OR lao pdr OR "lao  
people's democratic  
republic" OR latvia OR  
lebanon OR lebanese  
republic OR lesotho OR  
basutoland OR liberia  
OR libya OR libyan arab  
jamahiriya OR lithuania  
OR macau OR macao  
OR republic of north  
macedonia OR  
macedonia OR  
madagascar OR  
malagasy republic OR  
malawi OR nyasaland  
OR malaysia OR malay  
federation OR malaya  
federation OR maldives  
OR indian ocean islands

OR indian ocean OR mali  
OR malta OR micronesia  
OR federated states of  
micronesia OR kiribati  
OR marshall islands OR  
nauru OR northern  
mariana islands OR  
palau OR tuvalu OR  
mauritania OR mauritius  
OR mexico OR moldova  
OR moldovian OR  
mongolia OR  
montenegro OR morocco  
OR ifni OR mozambique  
OR portuguese east  
africa OR myanmar OR  
burma OR namibia OR  
nepal OR netherlands  
antilles OR nicaragua OR  
niger OR nigeria OR  
oman OR muscat OR  
pakistan OR panama OR  
papua new guinea OR  
new guinea OR paraguay  
OR peru OR philippines  
OR philipines OR  
phillippines OR  
phillippines OR poland  
OR "polish people's  
republic" OR portugal OR  
portuguese republic OR  
puerto rico OR romania  
OR russia OR russian  
federation OR ussr OR  
soviet union OR union of  
soviet socialist republics  
OR rwnda OR ruanda  
OR samoa OR pacific  
islands OR polynesia OR  
samoan islands OR  
navigator island OR  
navigator islands OR  
"sao tome and principe"  
OR saudi arabia OR  
senegal OR serbia OR  
seychelles OR sierra  
leone OR slovakia OR



slovak republic OR  
slovenia OR melanesia  
OR solomon island OR  
solomon islands OR  
norfolk island OR norfolk  
islands OR somalia OR  
south africa OR south  
sudan OR sri lanka OR  
ceylon OR "saint kitts  
and nevis" OR "st. kitts  
and nevis" OR saint lucia  
OR "st. lucia" OR "saint  
vincent and the  
grenadines" OR saint  
vincent OR "st. vincent"  
OR grenadines OR  
sudan OR suriname OR  
surinam OR dutch guiana  
OR netherlands guiana  
OR syria OR syrian arab  
republic OR tajikistan OR  
tadjikistan OR  
tadzhikistan OR tadzhik  
OR tanzania OR  
tanganyika OR thailand  
OR siam OR timor leste  
OR east timor OR togo  
OR togolese republic OR  
tonga OR "trinidad and  
tobago" OR trinidad OR  
tobago OR tunisia OR  
turkey OR turkmenistan  
OR turkmen OR uganda  
OR ukraine OR uruguay  
OR uzbekistan OR uzbek  
OR vanuatu OR new  
hebrides OR venezuela  
OR vietnam OR viet nam  
OR middle east OR west  
bank OR gaza OR  
palestine OR yemen OR  
yugoslavia OR zambia  
OR zimbabwe OR  
northern rhodesia OR  
global south OR africa  
south of the sahara OR  
sub-saharan africa OR

subsaharan africa OR  
 africa, central OR central  
 africa OR africa, northern  
 OR north africa OR  
 northern africa OR  
 magreb OR maghrib OR  
 sahara OR africa,  
 southern OR southern  
 africa OR africa, eastern  
 OR east africa OR  
 eastern africa OR africa,  
 western OR west africa  
 OR western africa OR  
 west indies OR indian  
 ocean islands OR  
 caribbean OR central  
 america OR latin america  
 OR "south and central  
 america" OR south  
 america OR asia, central  
 OR central asia OR asia,  
 northern OR north asia  
 OR northern asia OR  
 asia, southeastern OR  
 southeastern asia OR  
 south eastern asia OR  
 southeast asia OR south  
 east asia OR asia,  
 western OR western asia  
 OR europe, eastern OR  
 east europe OR eastern  
 europe ) AND AB  
 "primary health\*"

|    |                                                                                                                                                                                                                                                                                  |                                         |                                                                                                               |    |
|----|----------------------------------------------------------------------------------------------------------------------------------------------------------------------------------------------------------------------------------------------------------------------------------|-----------------------------------------|---------------------------------------------------------------------------------------------------------------|----|
| S1 | AB ( "Quality Improvement+" OR "Quality of Health Care+" OR "Total Quality Management" OR "Quality Assurance, Health Care" OR "Quality Indicators, Health Care+" ) AND AB ( afghanistan OR albania OR algeria OR american samoa OR angola OR "antigua and barbuda" OR antigua OR | Search modes - Find all my search terms | Interface - EBSCOhost<br>Research Databases<br>Search Screen - Advanced Search<br>Database - MEDLINE Complete | 43 |
|----|----------------------------------------------------------------------------------------------------------------------------------------------------------------------------------------------------------------------------------------------------------------------------------|-----------------------------------------|---------------------------------------------------------------------------------------------------------------|----|

barbuda OR argentina  
OR armenia OR  
armenian OR aruba OR  
azerbaijan OR bahrain  
OR bangladesh OR  
barbados OR republic of  
belarus OR belarus OR  
byelarus OR belorussia  
OR byelorussian OR  
belize OR british  
honduras OR benin OR  
dahomey OR bhutan OR  
bolivia OR "bosnia and  
herzegovina" OR bosnia  
OR herzegovina OR  
botswana OR  
bechuanaland OR brazil  
OR brasil OR bulgaria  
OR burkina faso OR  
burkina fasso OR upper  
volta OR burundi OR  
urundi OR cabo verde  
OR cape verde OR  
cambodia OR  
kampuchea OR khmer  
republic OR cameroon  
OR cameron OR  
cameroun OR central  
african republic OR  
ubangi shari OR chad  
OR chile OR china OR  
colombia OR comoros  
OR comoro islands OR  
iles comores OR mayotte  
OR democratic republic  
of the congo OR  
democratic republic  
congo OR congo OR  
zaire OR costa rica OR  
"cote d'ivoire" OR "cote d'  
ivoire" OR cote divoire  
OR cote d ivoire OR ivory  
coast OR croatia OR  
cuba OR cyprus OR  
czech republic OR  
czechoslovakia OR  
djibouti OR french

somaliland OR dominica  
OR dominican republic  
OR ecuador OR egypt  
OR united arab republic  
OR el salvador OR  
equatorial guinea OR  
spanish guinea OR  
eritrea OR estonia OR  
eswatini OR swaziland  
OR ethiopia OR fiji OR  
gabon OR gabonese  
republic OR gambia OR  
"georgia (republic)" OR  
georgian OR ghana OR  
gold coast OR gibraltar  
OR greece OR grenada  
OR guam OR guatemala  
OR guinea OR guinea  
bissau OR guyana OR  
british guiana OR haiti  
OR hispaniola OR  
honduras OR hungary  
OR india OR indonesia  
OR timor OR iran OR  
iraq OR isle of man OR  
jamaica OR jordan OR  
kazakhstan OR kazakh  
OR kenya OR  
"democratic people's  
republic of korea" OR  
republic of korea OR  
north korea OR south  
korea OR korea OR  
kosovo OR kyrgyzstan  
OR kirghizia OR  
kirgizstan OR kyrgyz  
republic OR kirghiz OR  
laos OR lao pdr OR "lao  
people's democratic  
republic" OR latvia OR  
lebanon OR lebanese  
republic OR lesotho OR  
basutoland OR liberia  
OR libya OR libyan arab  
jamahiriya OR lithuania  
OR macau OR macao  
OR republic of north

macedonia OR  
macedonia OR  
madagascar OR  
malagasy republic OR  
malawi OR nyasaland  
OR malaysia OR malay  
federation OR malaya  
federation OR maldives  
OR indian ocean islands  
OR indian ocean OR mali  
OR malta OR micronesia  
OR federated states of  
micronesia OR kiribati  
OR marshall islands OR  
nauru OR northern  
mariana islands OR  
palau OR tuvalu OR  
mauritania OR mauritius  
OR mexico OR moldova  
OR moldovian OR  
mongolia OR  
montenegro OR morocco  
OR ifni OR mozambique  
OR portuguese east  
africa OR myanmar OR  
burma OR namibia OR  
nepal OR netherlands  
antilles OR nicaragua OR  
niger OR nigeria OR  
oman OR muscat OR  
pakistan OR panama OR  
papua new guinea OR  
new guinea OR paraguay  
OR peru OR philippines  
OR philipines OR  
phillipines OR  
phillippines OR poland  
OR "polish people's  
republic" OR portugal OR  
portuguese republic OR  
puerto rico OR romania  
OR russia OR russian  
federation OR ussr OR  
soviet union OR union of  
soviet socialist republics  
OR rwanada OR ruanda  
OR samoa OR pacific

islands OR polynesia OR  
samoan islands OR  
navigator island OR  
navigator islands OR  
"sao tome and principe"  
OR saudi arabia OR  
senegal OR serbia OR  
seychelles OR sierra  
leone OR slovakia OR  
slovak republic OR  
slovenia OR melanesia  
OR solomon island OR  
solomon islands OR  
norfolk island OR norfolk  
islands OR somalia OR  
south africa OR south  
sudan OR sri lanka OR  
ceylon OR "saint kitts  
and nevis" OR "st. kitts  
and nevis" OR saint lucia  
OR "st. lucia" OR "saint  
vincent and the  
grenadines" OR saint  
vincent OR "st. vincent"  
OR grenadines OR  
sudan OR suriname OR  
surinam OR dutch guiana  
OR netherlands guiana  
OR syria OR syrian arab  
republic OR tajikistan OR  
tadjikistan OR  
tadzhikistan OR tadjik  
OR tanzania OR  
tanganyika OR thailand  
OR siam OR timor leste  
OR east timor OR togo  
OR togolese republic OR  
tonga OR "trinidad and  
tobago" OR trinidad OR  
tobago OR tunisia OR  
turkey OR turkmenistan  
OR turkmen OR uganda  
OR ukraine OR uruguay  
OR uzbekistan OR uzbek  
OR vanuatu OR new  
hebrides OR venezuela  
OR vietnam OR viet nam

OR middle east OR west  
bank OR gaza OR  
palestine OR yemen OR  
yugoslavia OR zambia  
OR zimbabwe OR  
northern rhodesia OR  
global south OR africa  
south of the sahara OR  
sub-saharan africa OR  
subsaharan africa OR  
africa, central OR central  
africa OR africa, northern  
OR north africa OR  
northern africa OR  
magreb OR maghrib OR  
sahara OR africa,  
southern OR southern  
africa OR africa, eastern  
OR east africa OR  
eastern africa OR africa,  
western OR west africa  
OR western africa OR  
west indies OR indian  
ocean islands OR  
caribbean OR central  
america OR latin america  
OR "south and central  
america" OR south  
america OR asia, central  
OR central asia OR asia,  
northern OR north asia  
OR northern asia OR  
asia, southeastern OR  
southeastern asia OR  
south eastern asia OR  
southeast asia OR south  
east asia OR asia,  
western OR western asia  
OR europe, eastern OR  
east europe OR eastern  
europe )
